# Supplementary material
Source: publisher figshare collection journal article supplement (https://acs.figshare.com/ndownloader/files/5557061)
Supplement: Supplementary file 1 [file 5557061]

## Supporting Information

# Hexagonal $\beta$ -NaYF<sub>4</sub>:Yb<sup>3+</sup>, Er<sup>3+</sup> Nanoprism- incorporated Upconverting Layer in Perovskite Solar Cells for Near-infrared Sunlight Harvesting

*Jongmin Roh, Haejun Yu and Jyongsik Jang\**

\*School of Chemical and Biological Engineering, College of Engineering, Seoul National  
University, 599 Gwanangno, Gwanakgu, Seoul, 151-744, Korea

E-mail: [jsjang@plaza.snu.ac.kr](mailto:jsjang@plaza.snu.ac.kr); Fax: +82 2 888 1604; Tel.: +82 2 880 7069

## Experimental section

**Synthesis of hexagonal  $\text{NaYF}_4\text{:Yb}^{3+}$ ,  $\text{Er}^{3+}$  nanoprisms.** Hexagonal  $\text{NaYF}_4\text{:Yb}^{3+}$ ,  $\text{Er}^{3+}$  nanoprisms were synthesized using a modified hydrothermal process.<sup>1</sup> Typically, 7.8 mL of yttrium(III) nitrate hexahydrate (0.2 M, 99.8%, Sigma-Aldrich), 2 mL of ytterbium(III) nitrate pentahydrate (0.2 M, 99.9%, Sigma-Aldrich) and 0.2 mL of Erbium(III) nitrate pentahydrate (0.2 M, 99.9%, Sigma-Aldrich) were added to 20 mL of aqueous sodium citrate solution (2 M,  $\geq 99.9\%$ , Sigma-Aldrich) and stirred for 1 h to form  $\text{Ln}^{3+}$ -citrate complex. Then, 40 mL of aqueous solution containing ammonium fluoride (2.4 M,  $\geq 98.0\%$ , Sigma-Aldrich) was introduced to the above solution and stirred for 1 h. pH of the mixing solution was adjusted to 3 by nitric acid. After additional stirring for 5 min, the mixture was transferred to a 100 mL Teflon-lined stainless steel autoclave and heated at 180°C for 2 h. White precipitates were collected by centrifugation, washed with water and ethanol, and then dried at 60 °C in a vacuum oven.

**Device fabrication.**  $\text{TiO}_2$  paste was prepared by adding ethyl cellulose, lauric acid, and terpineol to an ethanol solution of  $\text{TiO}_2$  nanoparticles, followed by stirring and sonication.  $\text{TiO}_2$  nanoparticles were synthesized using a two-step hydrothermal method reported previously.<sup>2</sup> Ethanol was removed using a rotary evaporator. The paste was then mixed using a 3-roll mill to create a homogeneous mixture. The nominal composition of  $\text{TiO}_2$ /terpineol/ethyl cellulose /lauric acid was 1.25/6/0.9/0.3. The  $\text{NaYF}_4\text{:Yb}^{3+}$ ,  $\text{Er}^{3+}$  paste was prepared in the same manner as described above. Patterned FTO glass (8  $\Omega/\text{sq}$ , Pilkington) was cleaned by sonication in distilled water, acetone, and 2-propanol for 60 min each. An ethanolic solution of colloidal  $\text{TiO}_2$  nanoparticles and titanium diisopropoxide bis(acetylacetonate) (75 wt. % in isopropanol, Aldrich) was spin-coated on FTO glass at 5000 rpm for 30 s and heated at 150 °C for 20 min to

prepare the compact TiO<sub>2</sub> layer.<sup>3</sup> To prepare a NaYF<sub>4</sub>:Yb<sup>3+</sup>, Er<sup>3+</sup> upconverting mesoporous layer, the TiO<sub>2</sub> paste was mixed with the NaYF<sub>4</sub>:Yb<sup>3+</sup>, Er<sup>3+</sup> paste by a ratio of 1:3, 1:1 and 3:1 (25, 50 and 75 wt% NaYF<sub>4</sub>:Yb<sup>3+</sup>, Er<sup>3+</sup> respectively). The mixed paste diluted in ethanol at a weight ratio of 1:5 were spin-coated on the compact TiO<sub>2</sub> layer at 3000 rpm for 30 s and annealed at 500 °C for 30 min. The upconverting mesoporous flim was post-treated with aqueous TiCl<sub>4</sub> solution (20 mM, >98%, Aldrich) at 70 °C for 20 min and sintered at 500 °C for 30 min. To fabricate methylammonium lead iodide perovskite (CH<sub>3</sub>NH<sub>3</sub>PbI<sub>3</sub>) film, perovskite precursor solution was prepared by mixing 461 mg of PbI<sub>2</sub> (99.9985%, Alpha Aesar), 159 mg of CH<sub>3</sub>NH<sub>3</sub>I and 78 μL of dimethyl sulfoxide (DMSO, 99.5%, Sigma-Aldrich) (molar ratio 1:1:1) in 770 μL of N, N-dimethylformamide (DMF, 99.8%, Sigma-Aldrich) at a room temperature for 1 h. CH<sub>3</sub>NH<sub>3</sub>I was synthesized by the method reported elsewhere using methylamine (40 wt% in water, Sigma-Aldrich) and hydriodic acid (57 wt% in water, Sigma-Aldrich).<sup>2</sup> The completely dissolved solution was spin-coated on the upconverting mesoporous layer at 3000 rpm for 90 s, and 500 μL of diethyl ether was dripped at 10 s onto the rotating substrate. The precursor-coated film was heated on a hot plate at 65°C for 1 min and 100 °C for 60 min. Then the Spiro-OMeTAD solution was spin-coated on the perovskite layer at 3500 rpm for 30 s. The Spiro-OMeTAD solution was prepared by mixing 72 mg of Spiro-MeOTAD (Lumtec), 28.8 μL of tert-butylpyridine and 17.5 μL of acetonitrile solution containing 520 mg/mL lithium bis(trifluoromethylsulfonyl)imide salt in 1 mL of chlorobenzene. Finally, a 70 nm thick Au top electrode was deposited by thermal evaporation. The active area of the fabricated device was 0.09 cm<sup>2</sup>.

**Characterization.** The morphology of the hexagonal NaYF<sub>4</sub>:Yb<sup>3+</sup>, Er<sup>3+</sup> nanoprisms, upconverting mesoporous layer and cross sectional view of perovskite solar cell was observed by

Field-emission scanning electron microscopy (FE-SEM) a JEOL 6700. X-ray diffraction (XRD) was performed using a Bruker New D8 Advance with a Cu-K $\alpha$  radiation source ( $\lambda$ : 1.5406 Å) at 40 kV and 300 mA (12 kW). The Upconversion photoluminescence (PL) spectrum of the hexagonal NaYF<sub>4</sub>:Yb<sup>3+</sup>, Er<sup>3+</sup> nanoprisms was measured by a homemade spectrometer equipped with a 980 nm laser (SDL-980LM-500T, Shanghai Dream Lasers Technology), a monochromator (HoloSpec f/ 1.8i, Kaiser Optical Systems), and a charge-coupled device (CCD) camera (PIXIS 400BR, Princeton Instruments). The photocurrent–voltage ( $J$ – $V$ ) characteristics of the fabricated perovskite solar cells were evaluated using a 530 W xenon lamp (XIL model 05A50KS source units; AM 1.5 solar irradiance; intensity: 100 mW cm<sup>–2</sup>). The incident photon-to-current conversion efficiency (IPCE, PV Measurements, Inc.) was measured from 300 to 900 nm under short-circuit conditions. Electrochemical Impedance Spectroscopy (EIS) measurement was performed using a Zahner Elektrik IM6 analyzer under a dark condition.

## References

- (1) Liang, L.; Liu, Y.; Zhao, X.-Z., Double-shell  $\beta$ -NaYF<sub>4</sub>:Yb<sup>3+</sup>, Er<sup>3+</sup>/SiO<sub>2</sub>/TiO<sub>2</sub> Submicroplates as a Scattering and Upconverting Layer for Efficient Dye-sensitized Solar Cells. *Chem. Commun.* **2013**, 49, 3958-3960.
- (2) Im, J.-H.; Jang, I.-H.; Pellet, N.; Grätzel, M.; Park, N.-G., Growth of CH<sub>3</sub>NH<sub>3</sub>PbI<sub>3</sub> Cuboids with Controlled Size for High-Efficiency Perovskite Solar Cells. *Nat. Nanotechnol.* **2014**, 9, 927-932.

(3) Wojciechowski, K.; Saliba, M.; Leijtens, T.; Abate, A.; Snaith, H. J., Sub-150 °C Processed Meso-superstructured Perovskite Solar Cells with Enhanced Efficiency. *Energy Environ. Sci.* **2014**, 7, 1142-1147.

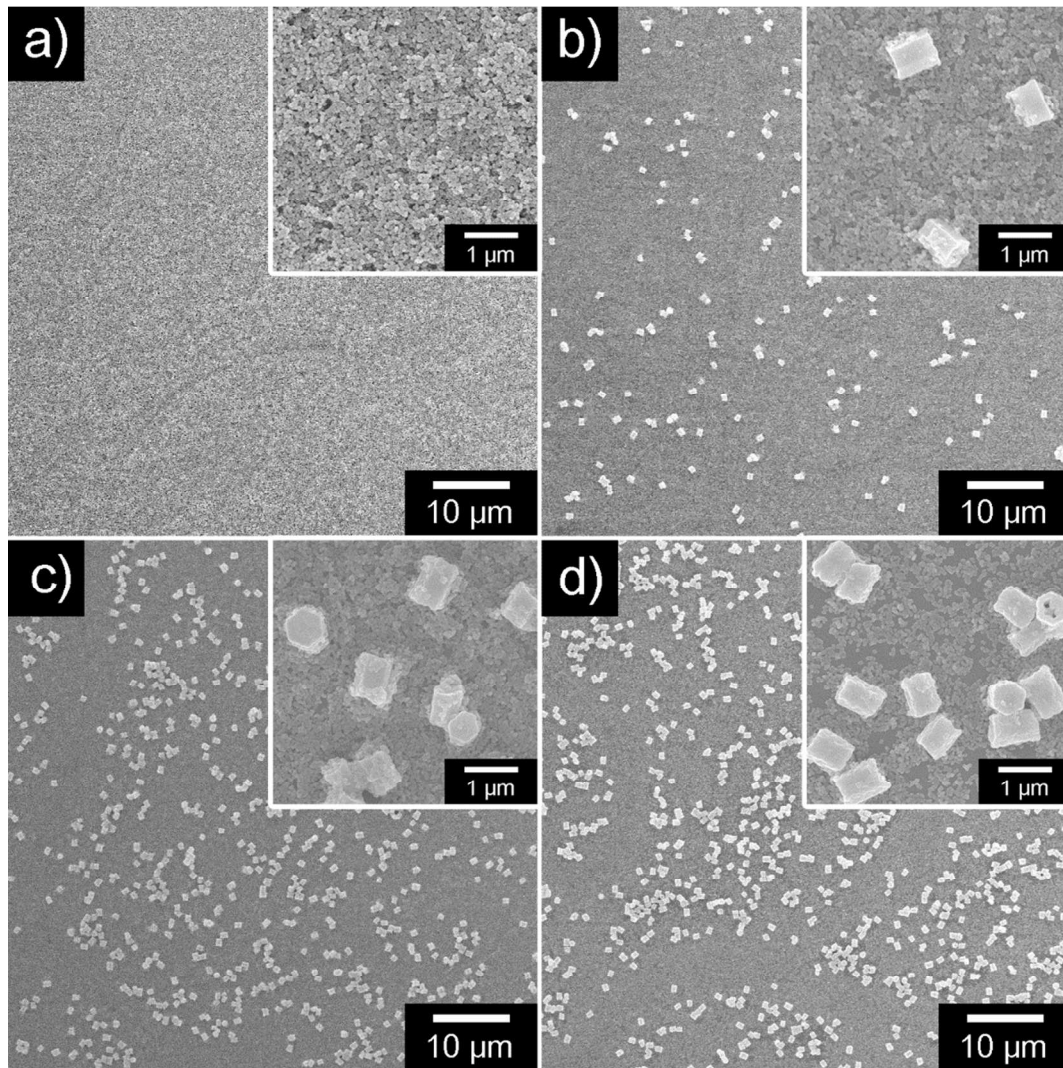

**Figure S1.** Scanning electron microscopy (SEM) images of the TiO<sub>2</sub> mesoporous layer with various NaYF<sub>4</sub>:Yb<sup>3+</sup>, Er<sup>3+</sup> nanoprism concentrations: a) only TiO<sub>2</sub> nanoparticles (reference), b) TiO<sub>2</sub> nanoparticles with 25 wt% NaYF<sub>4</sub>:Yb<sup>3+</sup>, Er<sup>3+</sup> nanoprisms, c) TiO<sub>2</sub> nanoparticles with 50 wt% NaYF<sub>4</sub>:Yb<sup>3+</sup>, Er<sup>3+</sup> nanoprisms, and d) TiO<sub>2</sub> nanoparticles with 75 wt% NaYF<sub>4</sub>:Yb<sup>3+</sup>, Er<sup>3+</sup> nanoprisms.

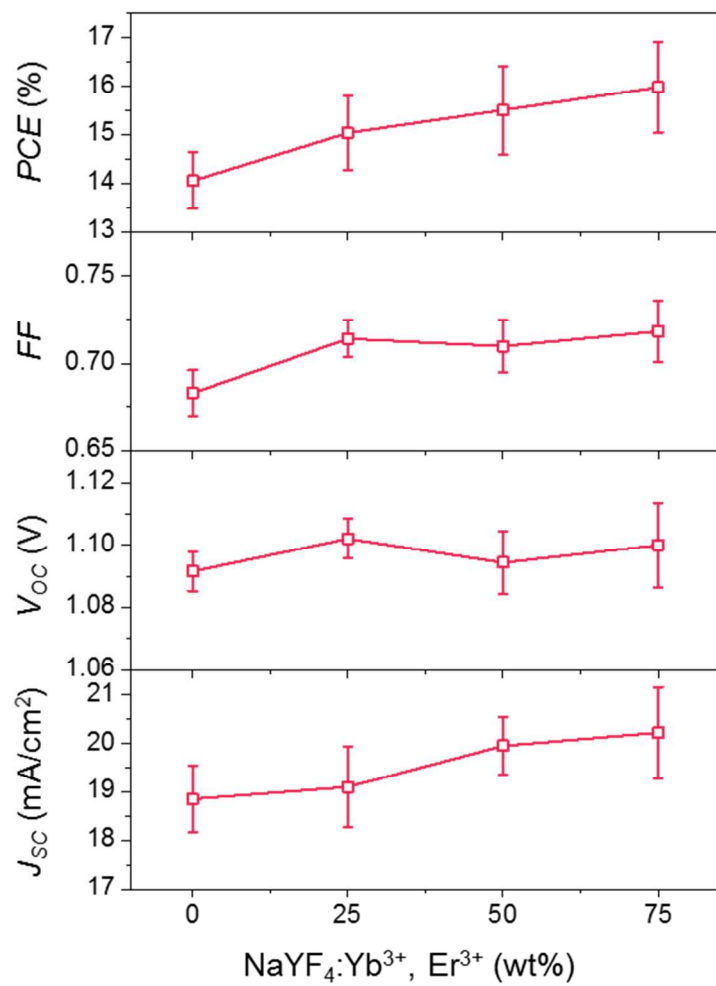

**Figure S2.** Photovoltaic performance of PSCs using an upconverting mesoporous layer with an increasing concentration of hexagonal  $\text{NaYF}_4:\text{Yb}^{3+}, \text{Er}^{3+}$  nanoprisms.

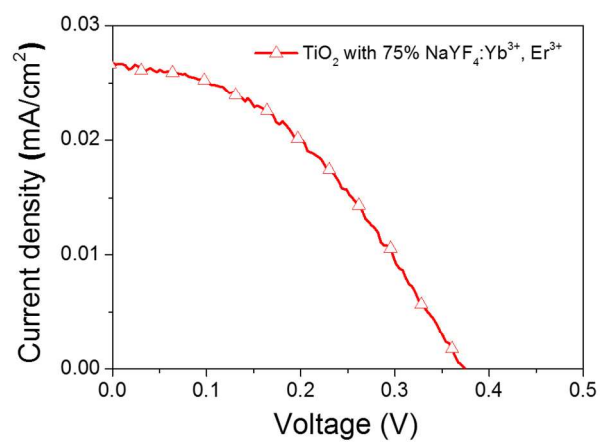

**Figure S3.** Current density-voltage curve obtained from PSC having a TiO<sub>2</sub> NP-based mesoporous layer with 75 wt% of NaYF<sub>4</sub>:Yb<sup>3+</sup>, Er<sup>3+</sup> under 980 nm NIR laser with laser power of 1W.



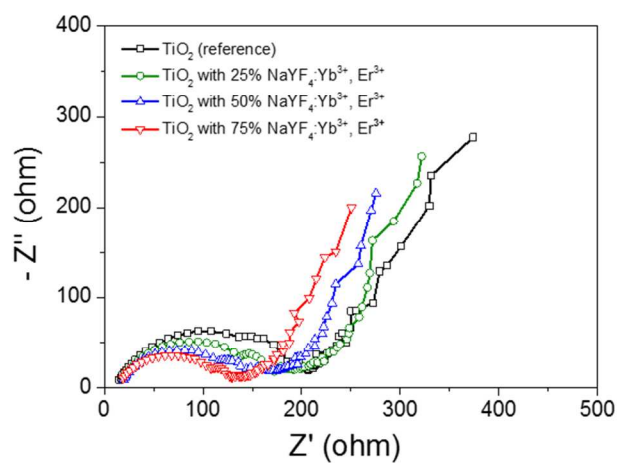

**Figure S4.** Electrochemical impedance spectroscopy (EIS) measurements performed under a light illumination of  $100 \text{ mW cm}^{-2}$  condition.

**Table S1.** Average photovoltaic parameters of perovskite solar cells (PSCs) containing hexagonal NaYF<sub>4</sub>:Yb<sup>3+</sup>, Er<sup>3+</sup> nanoprisms (0, 25, 50, and 75 wt%). Average values of all parameters were obtained for 15 devices.

| Devices                                                                             | $J_{sc}$ (mA cm <sup>-2</sup> ) | $V_{oc}$ (V) | $FF$        | $\eta$ (%)   |
|-------------------------------------------------------------------------------------|---------------------------------|--------------|-------------|--------------|
| TiO <sub>2</sub> (Reference)                                                        | 18.85 ± 0.69                    | 1.09 ± 0.01  | 0.68 ± 0.01 | 14.05 ± 0.59 |
| TiO <sub>2</sub> with 25%<br>NaYF <sub>4</sub> :Yb <sup>3+</sup> , Er <sup>3+</sup> | 19.10 ± 0.84                    | 1.10 ± 0.01  | 0.71 ± 0.01 | 15.04 ± 0.76 |
| TiO <sub>2</sub> with 50%<br>NaYF <sub>4</sub> :Yb <sup>3+</sup> , Er <sup>3+</sup> | 19.95 ± 0.60                    | 1.09 ± 0.01  | 0.71 ± 0.02 | 15.51 ± 0.92 |
| TiO <sub>2</sub> with 75%<br>NaYF <sub>4</sub> :Yb <sup>3+</sup> , Er <sup>3+</sup> | 20.23 ± 0.94                    | 1.10 ± 0.01  | 0.72 ± 0.02 | 15.98 ± 0.93 |

**Table S2.** Summary of the photovoltaic properties of PSC having a TiO<sub>2</sub> NP-based mesoporous layer with 75 wt% of NaYF<sub>4</sub>:Yb<sup>3+</sup>, Er<sup>3+</sup> nanoprisms.

| Devices                                                                             | $J_{SC}$ (mA cm <sup>-2</sup> ) | $V_{OC}$ (V) | $FF$ | $\eta$ (%) |
|-------------------------------------------------------------------------------------|---------------------------------|--------------|------|------------|
| TiO <sub>2</sub> with 75%<br>NaYF <sub>4</sub> :Yb <sup>3+</sup> , Er <sup>3+</sup> | 0.027                           | 0.374        | 0.41 | 0.01       |
